# Supplementary material
Source: PubMed Central journal article supplement (PMC8173469)
Supplement: jamacardiol-e211573-s001.pdf [file jamacardiol-e211573-s001.pdf]

## Supplemental Online Content

Guo L, Torii S, Fernandez R, et al. Genetic variants associated with unexplained sudden cardiac death in adult White and African American individuals. *JAMA Cardiol*. Published online June 2, 2021. doi:10.1001/jamacardio.2021.1573

**eMethods.** Supplementary Methods

**eFigure 1.** Types of P/LP Variants in Arrhythmia and Cardiomyopathy Genes in Individuals With Unexplained SCD

**eFigure 2.** Comparison of Allele Frequency in Cardiomyopathy and Arrhythmia Gene Variants in Individuals With Unexplained SCD vs the General Population

**eFigure 3.** Racial Differences in P/LP, Benign and Variants of Unknown Significance (VUS) in Arrhythmia and Cardiomyopathy Genes in Unexplained SCD

**eFigure 4.** Racial Differences in Survival SCD Between African American and White Individuals

**eTable 1.** List of Genes in the Cardiomyopathy Panel and Arrhythmia Panel

**eTable 2.** Patient Characteristics of Participants With Unexplained SCD and HCM

**eTable 3.** Participants With Pathogenic or Likely Pathogenic Variants

**eTable 4.** Patient Characteristics and Percentage Area Myocardial Fibrosis in Unexplained Sudden Cardiac Death cases with P/LP in HCM Genes and Detailed Septal Evaluations

**eTable 5.** Patient Characteristics in African American and White Individuals With and Without P/LP Gene Variants

**eTable 6.** Variants With Unknown Significance in African American Individuals Only, With Suspicion for a Pathogenic Role in Unexplained SCD

**eTable 7.** Allele Frequencies of P/LP Variants in Unexplained SCD Cohort and in gnomAD

**eReferences.**

This supplemental material has been provided by the authors to give readers additional information about their work.

## **eMethods. Supplementary Methods**

### **Study Design and Oversight**

Between 1995 and 2015, CVPath Institute was referred a total of 5,262 hearts from cases of unexpected sudden death from the Office of the Chief Medical Examiner of the State of Maryland (OCME-MD). (Unexpected sudden death cases in the state of Maryland are routinely referred to our Institute for consultation at the discretion of the medical examiner.) At OCME-MD, a complete and comprehensive autopsy and toxicologic analysis is performed in all referred decedents up to 50 years old and in cases over 50 years old without evidence of possible drug/alcohol abuse. For every case, the heart was systematically evaluated with detailed histopathological analysis performed by an experienced cardiac pathologist at CVPath Institute. To examine race-based differences, only African American or White individuals  $\geq 18$  years old were analyzed in the current study (n=4,270). The racial origin of subjects was identified from the OCME-MD report through inquiry of family members. The racial makeup of the study is similar to that of the State of Maryland - White: 50%, African American: 31%, Hispanic: 10%, Asian 6%, and others: 3%. Subjects with a clear non-cardiac cause of death as well as cases with lack of detailed information were excluded from the study (n=950). Subjects with SCD due to sudden coronary death (n=1,875; i.e. acute coronary syndrome,  $\geq 75\%$  stenosis in any major epicardial coronary artery, or previous bypass or stent placement) and other known causes of sudden cardiac death (n=762; i.e. cardiomyopathy (e.g. hypertrophic, dilated or arrhythmogenic right ventricular

cardiomyopathies, etc.), significant valvular disease, congenital heart disease, myo/pericarditis, or infective endocarditis) were excluded from the study. See Figure 1A for study flowchart. The protocol for the study was approved by the Institutional Review Board of the CVPPath Institute (Study ID: RP0027).

### **Assessment of Hearts to rule out any known cause of death.**

The hearts were weighed after blood clots had been removed from the cavities and the heart ventricles were sliced parallel to the posterior atrioventricular junction to determine the presence or absence of any necrosis or fibrosis. Pulmonary emboli and any right ventricular abnormalities were assessed to rule out any attributable cause of death. The base of the heart was opened in the direction of blood flow and all valves were determined to be normal. The epicardial coronary arteries were sectioned at three to four intervals to rule out any significant atherosclerosis (>75% cross-sectional area stenosis). The base of the heart at the level of the tip of the mitral valve was used to measure the left ventricle (LV) free wall, ventricular septal thickness, and right ventricular wall thickness followed by left ventricular cavity diameter excluding the pectinate and papillary muscles. In total six sections of myocardium (anterior, posterior, and lateral LV, ventricular septum, anterior and posterior wall of the right ventricle) were routinely taken transversely, embedded in paraffin, and stained with hematoxylin and eosin (H&E) stain for histologic evaluation. Histologic examination of all six parts of myocardium (anterior, posterior, and lateral left ventricle, ventricular septum, anterior and posterior wall of the right ventricle) was

performed to rule out any infiltrative process or any myofiber disarray of the myocardium, intramyocardial small vessel disease of interstitial or focal fibrosis. Presence of any cardiomyopathic process was ruled out by gross and histologic examination. Wall thickness measurements from subjects with normal hearts were consistent with previous autopsy studies of “normal hearts” <sup>1</sup>.

Of note, Maron et al. demonstrated that ventricular septal and free wall thicknesses were thicker in autopsy hearts when the thickness was compared with diastolic thickness measured by echocardiogram that was performed prior to death <sup>2</sup>. Therefore, wall thickness criteria used in clinical echocardiography is not used as a diagnostic criterion for cardiomyopathies during autopsy examination. Instead, increased septal/free wall ratio ( $\geq 1.3$ ) and/or abnormal histopathologic findings such as myofiber disarray, myocyte hypertrophy, fibrosis (scarring), and thickening of intramural coronary arteries are routinely used <sup>3-8</sup>.

### **Definition of Normal Hearts**

“Normal” heart was defined as an individual dying of natural causes with no evidence of heart disease following a complete gross and histopathological evaluation. Assessment of the myocardial sections ruled out the presence of any cardiomyopathic process. In addition, microscopic examination also helped to rule out severe myocyte hypertrophy (defined as cardiac myocyte thickness greater than 25  $\mu\text{m}$  <sup>9</sup>), and severe fibrosis in the myocardium (area of fibrosis >3% of the section) (Figure 1). Suspected unexplained-SCD was defined as symptoms commencing within one hour of death (with or without witnessed

arrest) or death occurring within 24 hours after the victim was last seen alive in their normal state of health, and in whom a clear cause of death (CoD) could not be established after a complete and comprehensive autopsy examination (including cardiac examination). All cases of SCD with normal autopsy were adjudicated to be unexplained by three cardiologists (ST, CCH, AVF) and a cardiac pathologist (RV) from the final autopsy report from OCME-MD and cardiac autopsy report from CVPath Institute. Adjudications were completed before the genetic results were made available.

### **Postmortem criteria for diagnosis**

Sudden coronary death was defined as subjects with acute coronary syndrome (acute thrombus in epicardial coronary artery due to plaque rupture, plaque erosion, or calcified nodule), old myocardial infarction, and at least one epicardial coronary artery with >75% cross-sectional area lumen narrowing by atherosclerotic plaque.

Explained-SCD was defined as subjects with autopsy findings consistent with evidence of cardiomyopathy [hypertrophic cardiomyopathy (HCM), dilated cardiomyopathy (DCM), arrhythmogenic right ventricular cardiomyopathy (ARVC)], congenital heart disease, myocarditis, infective endocarditis, and valvular disease (i.e. mitral valve prolapse, aortic valve stenosis, etc.).

Diagnostic criteria of HCM was increased septal/free wall ratio ( $\geq 1.3$ ) and/or abnormal histopathologic findings such as myofiber disarray, myocyte hypertrophy, fibrosis (scarring), and thickening of intramural coronary arteries<sup>3-8</sup>.

## **DNA Collection, Next-generation Sequencing and Data Analysis**

Genomic DNA was extracted from either fresh frozen tissue or formalin-fixed paraffin-embedded (FFPE) tissue blocks using DNeasy Tissue Kit and QIAamp DNA FFPE Tissue Kit (Qiagen), respectively. DNA samples were analyzed on TapeStation (Agilent) for quality check, and only the DNA samples met the quality requirements for TruSeq Custom Amplicon Low Input by TruSeq FFPE DNA Library Prep QC Kit (Illumina) and Primary Electrical Disorders (PED) MASTR Plus by MASTR QC plex (Muiltiplicom, Agilent) were used for library preparation. TruSeq Custom Amplicon Low Input was used to construct the libraries using custom designed cardiomyopathy gene panel for gene coding regions (Illumina, San Diego, CA). Libraries were multiplexed and sequenced on HiSeq 550 Rapid Run mode for > 100X coverage (Illumina). Fastq sequencing data were analyzed using TruSeq Amplicon workflow Version 3.0.0 on BaseSpace platform (Illumina), including Isas (analysis software) Version 1.1.7.9.271 + TSAv3, SAMtools Version 1.2, Isas Smith –Waterman-Gotoh (Aligner) Version 6.2.1.25+ develop, Pisces Variant Caller Version 5.2.1.22, and Illumina Annotation Engine 1.5.3.82 against human genome GRCh37/hg19. Alignment was performed using the banded Smith-Waterman algorithm in the targeted gene regions. Primary Electrical Disorders (PED) MASTR Plus was used to construct the libraries for the arrhythmia gene panel in gene coding regions (Muiltiplicom, Agilent, Belgium). The libraries were multiplexed and sequenced on HiSeq 550 Rapid Run mode for > 100X coverage (Illumina). Fastq sequencing data were analyzed using Sentieon Workflow pipeline on BaseSpace

platform (Illumina), which uses the same mathematics used in the Broad Institute's BWA-GATK HaplotypeCaller Best Practice Workflow pipelines. The genomic VCF files and BED files from both cardiomyopathy and arrhythmia panels were used for genomic variants callings analyses on SVS software Version 8.0 (Golden Helix, Bozeman, MT) and Integrative Genomics Viewer Version 2.4 (IGV) (Broad Institute).

### **Variant Filtering and Curation**

For curating new variants in the *MYH7* gene, we followed the rules and criteria set by the ClinGen expert panel <sup>10</sup>. For curating variants in other genes, we used the following criteria: PP1 (segregation): recommendations by Jarvik and Browning <sup>11</sup>. PP2 (missense variants are a common mechanism of disease): gnomAD missense constraint Z-score >3.09. PP3: REVEL score  $\geq 0.7$ ; if the REVEL score is between 0.6 and 0.7, and more than 8 out of 11 computational predictors support deleterious effect, it is also considered to be met. PM2\_Supporting: 0.00002 (0.002%) minor allele frequency in gnomAD. PM3 (for variants in genes with potential recessive phenotype): ClinGen Sequence Variant Interpretation Recommendation for in trans Criterion (PM3) - Version 1.0 ([https://clinicalgenome.org/site/assets/files/3717/svi\\_proposal\\_for\\_pm3\\_criterion\\_-\\_version\\_1.pdf](https://clinicalgenome.org/site/assets/files/3717/svi_proposal_for_pm3_criterion_-_version_1.pdf) ). PM5: if the missense change at the same codon as a likely pathogenic variant, PM5 is downgraded to PM5\_Supporting. PM6 and PS2 (*de novo*): evidence evaluated based on the point system recommended by ClinGen Sequence Variant Interpretation Recommendation for de novo Criteria

(PS2/PM6) version 1.0

([https://clinicalgenome.org/site/assets/files/3461/svi\\_proposal\\_for\\_de\\_novo\\_criteria\\_v1\\_0.pdf](https://clinicalgenome.org/site/assets/files/3461/svi_proposal_for_de_novo_criteria_v1_0.pdf)). PS4: See supplemental table below. PVS1: followed recommendations of the ClinGen SVI <sup>12</sup>. Since family investigations were not performed in this study, only public data was used for assigning the significance. Variants interpreted as pathogenic and likely pathogenic were selected for further analysis (see Supplemental Table 3 for ACMG criteria).

**The prevalence of the variant in affected individuals is significantly increased compared with the prevalence in controls**

GnomAD Allele Count excludes Finish and Ashkenazi Jewish. The total number of probands include CVPPath Registry data, and published literature where patient died of SCD, or which showed symptoms of arrhythmia or cardiomyopathy.

| gnomAD Allele Count | Probands |         |            |
|---------------------|----------|---------|------------|
|                     | PS4 Supp | PS4 Mod | PS4 Strong |
| 0                   | 1        | 2-3     | 4+         |
| 1                   | 2        | 3-4     | 5+         |
| 2                   | 3        | 4-5     | 6+         |
| 3                   | 4        | 5-6     | 7+         |
| 4                   | 5        | 6-7     | 8+         |

**Variant validation and Allele Frequency**

All P/LP variants with a read depth <15 were validated using Taqman genotyping assays (Assay IDs: C\_319910867\_10, C\_319910867\_10, C\_319237470\_10, C\_319902197\_10, C\_321850666\_10, C\_319906518\_10, C\_326756379\_10,



C\_380520918\_10, C\_\_86250392\_10, C\_330741028\_10, C\_162861639\_10, C\_345611191\_10, C\_319954324\_10, C\_317492721\_10, C\_332370884\_10, C\_332290735\_10, C\_332379549\_10, Hs00357608\_m1, C\_357804660\_10, Hs00357608\_m1, C\_319910870\_10, ANH6GP2, ANMF4VW, Thermo Fisher, Waltham, MA). Two additional P/LP variants were also validated in six samples using Taqman genotyping assays to confirm sequencing accuracy (Assay IDs: Hs00740082\_CE, and Hs00794484\_CE, Thermo Fisher, Waltham, MA). After variant classification, the MAF of benign variants, variants of unknown significance (VUS), and P/LP variants was compared with that of the general population using allele frequency data from TOPMED, ExAC, GnomAD, 1000G, and UK10K.

### **Detailed evaluation of myocardial fibrosis**

Four sections of anterior, posterior, and lateral left ventricle, ventricular septum from 21 most recent consecutive subjects with P/LP HCM gene variants and 22 most recent consecutive subjects without P/LP gene variants (median age; 36 vs. 34, respectively,  $p=0.8$ ) were evaluated for evidence of myocardial fibrosis.

Whole areas with myocardial fibrosis (which stains blue with Masson Trichrome stain) were measured using ZEN software (Zeiss, Oberkochen, Germany). As areas with perivascular fibrosis around the intramyocardial arteries vary widely between myocardial sections, perivascular fibrosis in  $\geq 0.2$ mm intramyocardial arteries were separately measured and subtracted from areas with myocardial fibrosis, and percent area myocardial fibrosis was calculated.

**eFigure 1. Types of P/LP Variants in Arrhythmia and Cardiomyopathy Genes in Individuals With Unexplained SCD**

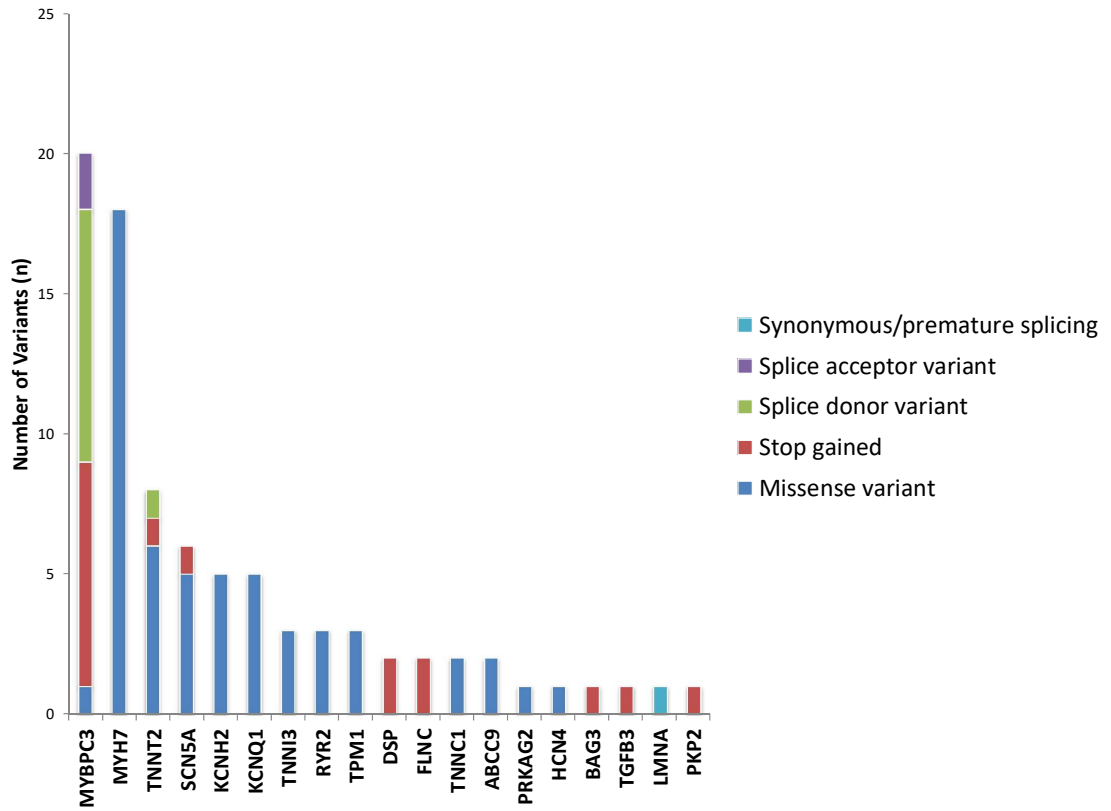

The numbers of each type of P/LP variants in each gene were categorized as missense variant, stop gained variant, synonymous/premature splicing variant, as well as splicing variant, including splicing donor and acceptor variants.

## eFigure 2. Comparison of Allele Frequency in Cardiomyopathy and Arrhythmia Gene Variants in Individuals With Unexplained SCD vs the General Population

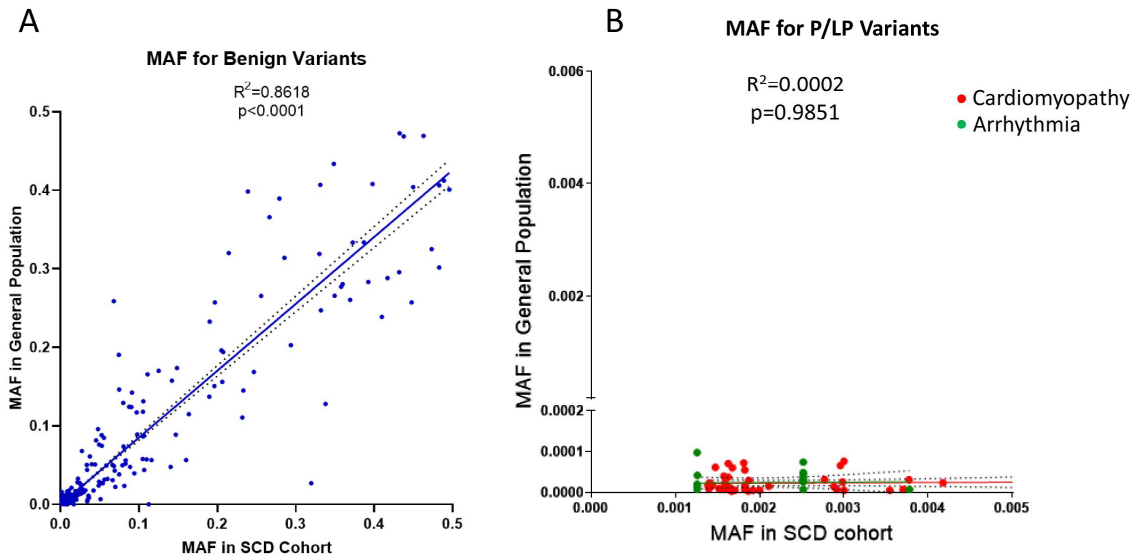

Comparison of minor allele frequency (MAF) for benign (A) and P/LP (B) variants between unexplained SCD cohort and the general population using Spearman's correlation. Note the MAF for benign variants was linear in nature (A) whereas the MAF for P/LP was much more common in our unexplained-SCD cohort versus the general population (B).

**eFigure 3. Racial Differences in P/LP, Benign and Variants of Unknown Significance (VUS) in Arrhythmia and Cardiomyopathy Genes in Unexplained SCD**

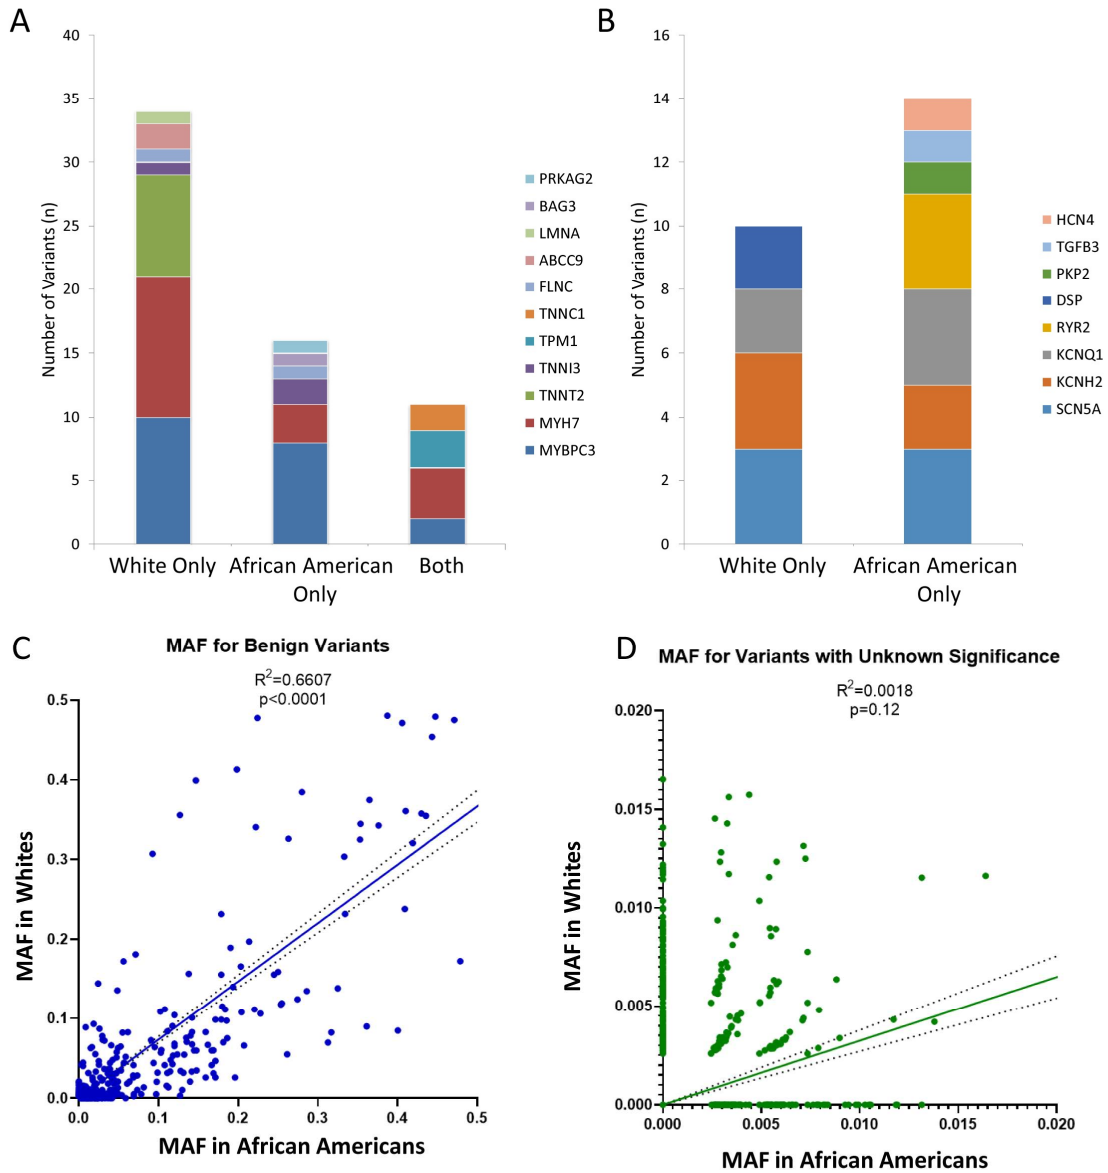

The distribution of numbers of P/LP variants per gene in African Americans only, Whites only, or in both, in cardiomyopathy genes (A) and arrhythmia genes (B). **C.** The correlation of MAF for benign variants between African Americans and Whites was similar in subjects with explained SCD. **D.** The correlation of MAF in subjects with unexplained SCD for VUS was skewed towards African Americans.

**eFigure 4. Racial Differences in Survival SCD Between African American and White Individuals**

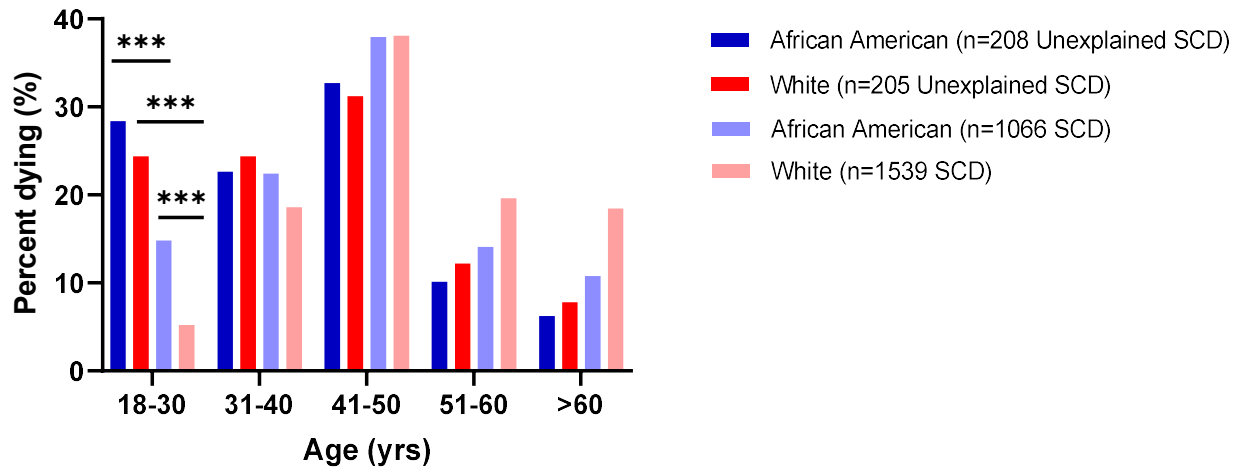

Age range at death for unexplained SCD (darker color) and autopsy evidenced SCD (lighter color) for both African Americans (blue) and Whites (red). \*\*\* p<0.001 by Fisher's Exact Test.

## Supplemental Tables

**Table 1. List of Genes in the Cardiomyopathy Panel and Arrhythmia Panel**

| No | Genes         | Cardiac Conditions (ClinGen Gene-Disease Validity Classification and Gene Curation Coalition by December 23, 2020) | Panel                |
|----|---------------|--------------------------------------------------------------------------------------------------------------------|----------------------|
| 1  | <i>ABCC9</i>  | DCM( <i>limited</i> ), Cantú syndrome( <i>definitive</i> )                                                         | Cardiomyopathy Panel |
| 2  | <i>ACTC1</i>  | HCM( <i>definitive</i> ), DCM( <i>moderate</i> ). LVNC, RCM                                                        | Cardiomyopathy Panel |
| 3  | <i>ACTN2</i>  | HCM( <i>moderate</i> ), DCM( <i>moderate</i> ), LVNC( <i>moderate</i> )                                            | Cardiomyopathy Panel |
| 4  | <i>ANKRD1</i> | HCM( <i>limited</i> ), DCM( <i>limited</i> )                                                                       | Cardiomyopathy Panel |
| 5  | <i>BAG3</i>   | HCM, DCM( <i>definitive</i> ), Myofibrillar myopathy( <i>definitive</i> ), RCM                                     | Cardiomyopathy Panel |
| 6  | <i>CAV3</i>   | HCM( <i>limited</i> ), DCM, LQTS                                                                                   | Cardiomyopathy Panel |
| 7  | <i>CSRP3</i>  | HCM( <i>strong/moderate</i> ), DCM( <i>limited</i> )                                                               | Cardiomyopathy Panel |
| 8  | <i>DES</i>    | DCM( <i>definitive</i> ), Myofibrillar myopathy( <i>definitive</i> ), ARVD/C( <i>moderate</i> )                    | Cardiomyopathy Panel |
| 9  | <i>FHL1</i>   | X-linked myopathy( <i>definitive</i> ), DCM                                                                        | Cardiomyopathy Panel |
| 10 | <i>FLNC</i>   | HCM( <i>strong</i> ), DCM( <i>definitive</i> ), Myofibrillar myopathy( <i>definitive</i> ), ARVD/C, RCM            | Cardiomyopathy Panel |
| 11 | <i>LAMP2</i>  | Danon disease (HCM, DCM) ( <i>definitive, X-Linked</i> )                                                           | Cardiomyopathy Panel |
| 12 | <i>LMNA</i>   | DCM( <i>definitive</i> ), ARVD/C( <i>limited</i> )                                                                 | Cardiomyopathy Panel |
| 13 | <i>LDB3</i>   | HCM, DCM( <i>limited</i> ), LVNC, ARVD/C( <i>disputed</i> )                                                        | Cardiomyopathy Panel |
| 14 | <i>MYBPC3</i> | HCM( <i>definitive</i> ), DCM( <i>limited</i> ), ARVD/C( <i>limited</i> ), LVNC, RCM                               | Cardiomyopathy Panel |
| 15 | <i>MYH6</i>   | HCM( <i>limited</i> ), DCM( <i>limited</i> )                                                                       | Cardiomyopathy Panel |
| 16 | <i>MYH7</i>   | HCM( <i>definitive</i> ), DCM( <i>definitive</i> ), ARVD/C( <i>limited</i> ), RCM                                  | Cardiomyopathy Panel |
| 17 | <i>MYL2</i>   | HCM( <i>definitive/strong</i> ), DCM( <i>limited</i> )                                                             | Cardiomyopathy Panel |
| 18 | <i>MYL3</i>   | HCM( <i>definitive/strong</i> ), ARVD/C( <i>limited</i> ), DCM( <i>disputed</i> ), RCM                             | Cardiomyopathy Panel |
| 19 | <i>MYPN</i>   | Nemaline myopathy( <i>definitive</i> ), HCM( <i>limited</i> ), DCM( <i>limited</i> )                               | Cardiomyopathy Panel |
| 20 | <i>NEXN</i>   | HCM( <i>limited</i> ), DCM( <i>moderate</i> )                                                                      | Cardiomyopathy Panel |
| 21 | <i>PDLIM3</i> | HCM( <i>limited</i> ), DCM( <i>disputed</i> )                                                                      | Cardiomyopathy Panel |
| 22 | <i>PLN</i>    | HCM( <i>definitive/strong</i> ), DCM, ARVD/C                                                                       | Cardiomyopathy Panel |
| 23 | <i>PRKAG2</i> | HCM( <i>definitive/strong</i> ), Wolff-Parkinson-White syndrome                                                    | Cardiomyopathy Panel |
| 24 | <i>TCAP</i>   | HCM( <i>limited</i> ), DCM( <i>limited</i> )                                                                       | Cardiomyopathy Panel |
| 25 | <i>TNNC1</i>  | HCM( <i>moderate</i> ), DCM( <i>definitive</i> )                                                                   | Cardiomyopathy Panel |
| 26 | <i>TNNI3</i>  | HCM( <i>definitive/strong</i> ), DCM( <i>moderate</i> ), RCM                                                       | Cardiomyopathy Panel |
| 27 | <i>TNNT2</i>  | HCM( <i>definitive/strong</i> ), DCM( <i>definitive</i> ), LVNC, RCM                                               | Cardiomyopathy Panel |
| 28 | <i>TPM1</i>   | HCM( <i>definitive/strong</i> ), DCM( <i>moderate</i> ), RCM                                                       | Cardiomyopathy Panel |

| No | Genes           | Cardiac Conditions (ClinGen Gene-Disease Validity Classification by 2020)                                                                  | Panel                |
|----|-----------------|--------------------------------------------------------------------------------------------------------------------------------------------|----------------------|
| 29 | <i>TTR</i>      | ATTR Amyloidosis (HCM)( <i>definitive</i> )                                                                                                | Cardiomyopathy Panel |
| 30 | <i>VCL</i>      | HCM( <i>limited</i> ), DCM( <i>moderate</i> ), LVNC                                                                                        | Cardiomyopathy Panel |
| 31 | <i>AKAP9</i>    | LQTS( <i>limited</i> )                                                                                                                     | Arrhythmia Panel     |
| 32 | <i>ANK2</i>     | LQTS, CPVT, BrS( <i>disputed</i> )                                                                                                         | Arrhythmia Panel     |
| 33 | <i>CACNA1C</i>  | Timothy syndrome( <i>definitive</i> ), LQTS( <i>moderate</i> ), BrS( <i>disputed</i> )                                                     | Arrhythmia Panel     |
| 34 | <i>CACNA2D1</i> | BrS( <i>disputed</i> )                                                                                                                     | Arrhythmia Panel     |
| 35 | <i>CACNB2</i>   | BrS( <i>disputed</i> )                                                                                                                     | Arrhythmia Panel     |
| 36 | <i>CAV3</i>     | LQTS, HCM( <i>limited</i> ), DCM                                                                                                           | Arrhythmia Panel     |
| 37 | <i>CTNNA3</i>   | ARVD/C( <i>limited</i> )                                                                                                                   | Arrhythmia Panel     |
| 38 | <i>DES</i>      | DCM( <i>definitive</i> ), Myofibrillar myopathy( <i>definitive</i> ), ARVD/C( <i>moderate</i> )                                            | Arrhythmia Panel     |
| 39 | <i>DSC2</i>     | ARVD/C( <i>definitive</i> ), DCM                                                                                                           | Arrhythmia Panel     |
| 40 | <i>DSG2</i>     | ARVD/C( <i>definitive</i> ), DCM( <i>limited</i> )                                                                                         | Arrhythmia Panel     |
| 41 | <i>DSP</i>      | ARVD/C( <i>definitive</i> ), DCM( <i>strong</i> )                                                                                          | Arrhythmia Panel     |
| 42 | <i>GPD1L</i>    | BrS( <i>disputed</i> )                                                                                                                     | Arrhythmia Panel     |
| 43 | <i>HCN4</i>     | BrS( <i>disputed</i> ), Familial thoracic aortic aneurysm and aortic dissection( <i>limited</i> ), LVNC                                    | Arrhythmia Panel     |
| 44 | <i>JUP</i>      | ARVD/C( <i>definitive</i> )                                                                                                                | Arrhythmia Panel     |
| 45 | <i>KCND3</i>    | BrS( <i>disputed</i> )                                                                                                                     | Arrhythmia Panel     |
| 46 | <i>KCNE1</i>    | LQTS, Jervell and Lange-Nielsen syndrome( <i>strong/moderate</i> )                                                                         | Arrhythmia Panel     |
| 47 | <i>KCNE2</i>    | LQTS                                                                                                                                       | Arrhythmia Panel     |
| 48 | <i>KCNE3</i>    | BrS( <i>disputed</i> )                                                                                                                     | Arrhythmia Panel     |
| 49 | <i>KCNE5</i>    | BrS( <i>disputed</i> )                                                                                                                     | Arrhythmia Panel     |
| 50 | <i>KCNH2</i>    | LQTS( <i>strong</i> )                                                                                                                      | Arrhythmia Panel     |
| 51 | <i>KCNJ5</i>    | LQTS                                                                                                                                       | Arrhythmia Panel     |
| 52 | <i>KCNJ2</i>    | SQTS                                                                                                                                       | Arrhythmia Panel     |
| 53 | <i>KCNJ8</i>    | BrS( <i>disputed</i> )                                                                                                                     | Arrhythmia Panel     |
| 54 | <i>KCNQ1</i>    | LQTS( <i>strong</i> ), SQTS, Jervell and Lange-Nielsen syndrome( <i>definitive/strong</i> )                                                | Arrhythmia Panel     |
| 55 | <i>NKX2-5</i>   | Atrial heart septal defect( <i>definitive</i> ), tetralogy of Fallot( <i>definitive</i> ), Ventricular fibrillation, DCM( <i>limited</i> ) | Arrhythmia Panel     |
| 56 | <i>NOS1AP</i>   | Ventricular fibrillation                                                                                                                   | Arrhythmia Panel     |
| 57 | <i>PKP2</i>     | ARVD/C( <i>definitive</i> ), BrS( <i>disputed</i> )                                                                                        | Arrhythmia Panel     |
| 58 | <i>RANGRF</i>   | BrS( <i>disputed</i> )                                                                                                                     | Arrhythmia Panel     |
| 59 | <i>RYR2</i>     | ARVD/C( <i>refuted</i> ), CPVT( <i>definitive</i> ), LQTS, HCM( <i>limited</i> )                                                           | Arrhythmia Panel     |
| 60 | <i>SCN1B</i>    | BrS( <i>definitive/disputed</i> ), epilepsy with febrile seizures ( <i>definitive</i> )                                                    | Arrhythmia Panel     |
| 61 | <i>SCN2B</i>    | BrS( <i>disputed</i> )                                                                                                                     | Arrhythmia Panel     |
| 62 | <i>SCN3B</i>    | BrS( <i>disputed</i> )                                                                                                                     | Arrhythmia Panel     |

| No | Genes  | Cardiac Conditions (ClinGen Gene-Disease Validity Classification by 2020)                                                                             | Panel            |
|----|--------|-------------------------------------------------------------------------------------------------------------------------------------------------------|------------------|
| 63 | SCN4B  | LQTS( <i>limited</i> )                                                                                                                                | Arrhythmia Panel |
| 64 | SCN5A  | ARVD/C( <i>limited</i> ), BrS( <i>definitive</i> ), LQTS, DCM( <i>definitive</i> )                                                                    | Arrhythmia Panel |
| 65 | SLMAP  | BrS( <i>disputed</i> )                                                                                                                                | Arrhythmia Panel |
| 66 | SNTA1  | LQTS( <i>disputed</i> )                                                                                                                               | Arrhythmia Panel |
| 67 | TGFB3  | ARVD/C( <i>limited</i> ), Loeys-Dietz syndrome( <i>definitive/strong</i> ), Familial thoracic aortic aneurysm and aortic dissection( <i>limited</i> ) | Arrhythmia Panel |
| 68 | TMEM43 | ARVD/C( <i>definitive</i> )                                                                                                                           | Arrhythmia Panel |
| 69 | TRDN   | LQTS( <i>definitive/strong</i> )                                                                                                                      | Arrhythmia Panel |

CAV3 and DES genes are present in both Hypertrophic Cardiomyopathy; HCM. Dilated Cardiomyopathy; DCM. Restrictive Cardiomyopathy; RCM. Long QT Syndrome; LQTS. Brugada Syndrome; BrS. Catecholaminergic polymorphic ventricular tachycardia; CPVT. Left ventricular non-compaction syndrome; LVNC. Arrhythmogenic Right Ventricular Dysplasia/Cardiomyopathy; ARVD/C.



**eTable 2. Patient Characteristics of Participants With Unexplained SCD (A) and HCM (B)**

**A. The patient characteristics in the total of 413 subjects with unexplained sudden cardiac death (SCD)**

| <b>Patient Characteristics</b>     | <b>Unexplained SCD n=413</b> |                  |
|------------------------------------|------------------------------|------------------|
| Age                                | 41 (29-48)                   |                  |
| Sex (Female), n (%)                | 154 (37%)                    |                  |
| Race (African American), n (%)     | 208 (50%)                    |                  |
| <b>Body / Heart Dimensions</b>     | <b>Women n=154</b>           | <b>Men n=259</b> |
| Body height, cm                    | 168 (163-173)                | 178 (173-183)    |
| Body Weight, kg                    | 79 (63-98)                   | 83 (71-97)       |
| Body Mass Index, kg/m <sup>2</sup> | 28.7 (23.3-34.9)             | 26.8 (22.6-30.0) |
| Body Surface Area, m <sup>2</sup>  | 1.79 (1.60-1.99)             | 1.89 (1.73-2.05) |
| Heart Weight, g                    | 350 (300-420)                | 420 (380-460)    |
| LV diameter, mm                    | 35 (30-40)                   | 35 (30-40)       |
| LV free wall thickness, mm         | 13 (11-14)                   | 14 (12-15)       |
| Septum thickness, mm               | 14 (12-15)                   | 15 (14-16)       |
| RV thickness, mm                   | 4 (4-5)                      | 5 (4-5)          |
| Septum / Free wall ratio           | 1.1 (1.0-1.2)                | 1.1 (1.0-1.2)    |

**B. The patient characteristics in the total of 49 subjects with hypertrophic cardiomyopathy**

| <b>Patient Characteristics</b>     | HCM n=49         |                  | p value (Comparing to A.) |         |
|------------------------------------|------------------|------------------|---------------------------|---------|
| Age                                | 42 (30-50)       |                  | 0.8                       |         |
| Sex (Female), n (%)                | 6 (12%)          |                  | 0.0004                    |         |
| Race (African American), n (%)     | 28 (57%)         |                  | 0.5                       |         |
| <b>Body / Heart Dimensions</b>     | Women n=6        | Men n=43         | P (women)                 | P (men) |
| Body height, cm                    | 164 (159-171)    | 179 (174-185)    | 0.5                       | 0.3     |
| Body Weight, kg                    | 86 (65-108)      | 93 (83-114)      | 0.5                       | 0.0004  |
| Body Mass Index, kg/m <sup>2</sup> | 31.5 (26.2-37.6) | 30.2 (26.5-35.8) | 0.4                       | 0.0001  |
| Body Surface Area, m <sup>2</sup>  | 1.93 (1.70-2.14) | 2.11 (1.97-2.37) | 0.3                       | <0.0001 |
| Heart Weight, g                    | 653 (475-838)    | 600 (510-750)    | 0.0003                    | <0.0001 |
| LV diameter, mm                    | 33 (29-51)       | 38 (35-45)       | 0.7                       | 0.001   |
| LV free wall thickness, mm         | 17 (14-23)       | 17 (15-19)       | 0.0001                    | <0.0001 |
| Septum thickness, mm               | 25 (19-35)       | 20 (19-25)       | <0.0001                   | <0.0001 |
| RV thickness, mm                   | 6 (5-10)         | 6 (5-7)          | 0.0004                    | <0.0001 |
| Septum / Free wall ratio           | 1.4 (1.1-1.9)    | 1.3 (1.1-1.5)    | 0.03                      | <0.0001 |

**eTable 3. Participants With Pathogenic or Likely Pathogenic Variants**

| Case ID | Variant ID | Gene   | cDNA variation | Amino acid changes | rs number   | Age | Race  | Gender | Circumstances of death | ACMG | ACMG Criteria Evidence                      | PMID                         |
|---------|------------|--------|----------------|--------------------|-------------|-----|-------|--------|------------------------|------|---------------------------------------------|------------------------------|
| 57      | 6          | MYBPC3 | c.505+1G>A     |                    | rs730880620 | 44  | White | Female | witnessed collapse     | P    | PVS1, PM2_supporting, PS4_supporting        |                              |
| 67      | 6          | MYBPC3 | c.505+1G>A     |                    | rs730880620 | 41  | White | Female | found dead at home     | P    | PVS1, PM2_supporting, PS4_supporting        |                              |
| 25      | 7          | MYBPC3 | c.1927+2T>C    |                    | rs869025467 | 46  | White | Male   | found dead at home     | P    | PVS1, PM2_supporting, PS1_supporting        |                              |
| 34      | 7          | MYBPC3 | c.1927+2T>C    |                    | rs869025467 | 20  | Black | Male   | witnessed collapse     | P    | PVS1, PM2_supporting, PS1_supporting        |                              |
| 70      | 12         | MYBPC3 | c.2905C>T      | p.Q969*            | rs397515992 | 40  | White | Male   | found dead at home     | P    | PS4, PM2_supporting, PVS1, PP1_strong       | 20359594, 21302287, 9541104  |
| 64      | 23         | MYBPC3 | c.3811C>T      | p.R1271*           | rs397516042 | 42  | Black | Male   | found dead at home     | LP   | PVS1_strong, PM2_supporting, PS4_supporting | 18533079, 19574547, 23396983 |
| 42      | 24         | MYBPC3 | c.3627+1G>A    |                    | rs397516031 | 43  | Black | Female | found dead at home     | P    | PVS1, PP1_strong, PS4, PM2_supporting       | 25351510, 19574547, 11499718 |

|    |    |        |             |          |              |    |       |        |                                   |   |                                         |                              |
|----|----|--------|-------------|----------|--------------|----|-------|--------|-----------------------------------|---|-----------------------------------------|------------------------------|
| 68 | 25 | MYBPC3 | c.3331-1G>A |          | rs727504305  | 37 | Black | Female | witnessed collapse                | P | PVS1, PM2_supporting, PS4_supporting    |                              |
| 47 | 26 | MYBPC3 | c.3293G>A   | p.W1098* | rs397516013  | 50 | White | Male   | found dead outside                | P | PM2_supporting, PS4, PVS1               | 20624503, 25031304, 23233322 |
| 22 | 27 | MYBPC3 | c.3253G>T   | p.E1085* | rs397516010  | 28 | Black | Female | found dead outside                | P | PVS1, PM2_supporting, PS4_supporting    | 28492532, 27532257, 25611685 |
| 45 | 28 | MYBPC3 | c.3190+1G>A |          | rs111683277  | 41 | Black | Female | found dead at home                | P | PVS1, PS4_moderate, PM2_supporting      | 27532257, 25611685, 25132132 |
| 6  | 29 | MYBPC3 | c.2992C>T   | p.Q998*  | rs11570112   | 54 | Black | Male   | found dead in bed                 | P | PM2_supporting, PS4_supporting, PVS1    | 20624503                     |
| 71 | 30 | MYBPC3 | c.1458G>A   | p.W486*  | rs1057517920 | 52 | White | Female | found dead at home                | P | PVS1, PM2_supporting, PS4_supporting    |                              |
| 40 | 31 | MYBPC3 | c.1351+1G>A |          | rs727503204  | 23 | White | Male   | witnessed collapse after exercise | P | PVS1, PS4_moderate, PM2_supporting, PP1 | 21750094, 19574547           |
| 66 | 32 | MYBPC3 | c.1273C>T   | p.Q425*  | rs397515895  | 36 | White | Male   | found dead at home                | P | PVS1, PM2_supporting, PS4_supporting    | 11815426, 18803133           |
| 51 | 33 | MYBPC3 | c.1223+1G>A |          | rs730880639  | 18 | White | Female | witnessed collapse                | P | PVS1, PM2_supporting,                   | 29497013                     |

|    |    |        |                 |         |             |    |       |        |                       |    |                                                               |                                    |
|----|----|--------|-----------------|---------|-------------|----|-------|--------|-----------------------|----|---------------------------------------------------------------|------------------------------------|
|    |    |        |                 |         |             |    |       |        |                       |    | PS1_supporting,<br>PS4_supporting                             |                                    |
| 65 | 34 | MYBPC3 | c.1090+1G><br>A |         | rs727504269 | 39 | Black | Male   | witnessed<br>collapse | P  | PVS1,<br>PM2_supporting,<br>PS4_supporting,<br>PS1_supporting | 16858239,<br>26914223              |
| 61 | 35 | MYBPC3 | c.927-2A>G      |         | rs397516082 | 24 | White | Male   | found dead at<br>home | P  | PVS1, PP1_strong,<br>PM2_supporting,<br>PS4_supporting        | 9562578,<br>22574137,<br>25078086  |
| 10 | 36 | MYBPC3 | c.292G>T        | p.E98*  | rs868819340 | 57 | Black | Female | witnessed<br>collapse | P  | PM2_supporting,<br>PS3, PVS1                                  | 19574547                           |
| 35 | 71 | MYBPC3 | c.2458C>T       | p.R820W | rs775404728 | 36 | White | Male   | found dead at<br>home | LP | PP1_moderate,<br>PM2_supporting,<br>PM5, PS4                  | 20378854                           |
| 36 | 1  | MYH7   | c.2710C>T       | p.R904C | rs727503253 | 46 | White | Female | found dead in<br>bed  | LP | PP1_strong,<br>PM2_supporting,<br>PM5,<br>PS4_supporting      | 20573160,<br>27532257,<br>29212898 |
| 38 | 1  | MYH7   | c.2710C>T       | p.R904C | rs727503253 | 49 | White | Male   | found dead at<br>home | LP | PP1_strong,<br>PM2_supporting,<br>PM5,<br>PS4_supporting      | 20573160,<br>27532257,<br>29212898 |
| 75 | 1  | MYH7   | c.2710C>T       | p.R904C | rs727503253 | 43 | White | Male   | found dead            | LP | PP1_strong,<br>PM2_supporting,<br>PM5,<br>PS4_supporting      | 20573160,<br>27532257,<br>29212898 |

|    |    |      |           |          |             |    |       |        |                    |    |                                               |                                        |
|----|----|------|-----------|----------|-------------|----|-------|--------|--------------------|----|-----------------------------------------------|----------------------------------------|
| 39 | 4  | MYH7 | c.1207C>T | p.R403W  | rs3218714   | 36 | Black | Female | witnessed collapse | P  | PP1_strong, PS4, PM2, PM5, PM1, PP3           | 1052196, 7662452, 7848420              |
| 46 | 4  | MYH7 | c.1207C>T | p.R403W  | rs3218714   | 30 | Black | Female | witnessed collapse | P  | PP1_strong, PS4, PM2, PM5, PM1, PP3           | 1052196, 7662452, 7848420              |
| 12 | 8  | MYH7 | c.596C>T  | p.A199V  | rs727504283 | 38 | Black | Female | witnessed collapse | LP | PP1_strong, PP3, PM1, PM2_supporting          | 27532257, 21310275, 23074333           |
| 59 | 8  | MYH7 | c.596C>T  | p.A199V  | rs727504283 | 20 | White | Male   | found dead in bed  | LP | PP1_strong, PP3, PM1, PM2_supporting          | 27532257, 21310275, 23074333           |
| 4  | 9  | MYH7 | c.5740G>A | p.E1914K | rs397516254 | 38 | White | Male   | found dead in bed  | LP | PM2, PM6, PP3, PS4_supporting                 | 27532257, 24664454                     |
| 21 | 9  | MYH7 | c.5740G>A | p.E1914K | rs397516254 | 43 | White | Male   | found dead at home | LP | PM2, PM6, PP3, PS4_supporting                 | 27532257, 24664454                     |
| 17 | 10 | MYH7 | c.4135G>A | p.A1379T | rs397516202 | 24 | Black | Male   | witnessed collapse | LP | PP1_Strong, PP3, PM2_supporting, PS4_moderate | 28790153, 21310275, 12707239, 11861413 |
| 28 | 10 | MYH7 | c.4135G>A | p.A1379T | rs397516202 | 21 | White | Female | found dead at home | LP | PP1_Strong, PP3, PM2_supporting, PS4_moderate | 28790153, 21310275, 12707239, 11861413 |
| 33 | 11 | MYH7 | c.1816G>A | p.V606M  | rs121913627 | 26 | White | Male   | found dead at home | P  | PS3, PM2_supporting,                          | 9826622, 9172070, 11377367             |

|    |    |       |           |              |             |    |       |        |                    |    |                                                                                   |                                    |
|----|----|-------|-----------|--------------|-------------|----|-------|--------|--------------------|----|-----------------------------------------------------------------------------------|------------------------------------|
|    |    |       |           |              |             |    |       |        |                    |    | PM1, PP3,<br>PP1_strong, PS4                                                      |                                    |
| 56 | 11 | MYH7  | c.1816G>A | p.V606M      | rs121913627 | 20 | White | Female | found dead at home | P  | PS3,<br>PM2_supporting,<br>PM1, PP3,<br>PP1_strong, PS4                           | 9826622,<br>9172070,<br>11377367   |
| 59 | 14 | MYH7  | c.2609G>A | p.R870H      | rs36211715  | 20 | White | Male   | found dead in bed  | P  | PP1_strong, PM1,<br>PM2_supporting,<br>PS4                                        |                                    |
| 50 | 37 | MYH7  | c.2334C>G | p.D778E      | rs2069544   | 55 | White | Male   | witnessed collapse | LP | PM5,<br>PM2_supporting,<br>PP2, PP3,<br>PS1_supporting,<br>PS4_supporting,<br>PP1 | 12707239,<br>12566107,<br>11748309 |
| 68 | 38 | MYH7  | c.741C>A  | p.F247L      | 14:23900682 | 37 | Black | Female | witnessed collapse | P  | PS1,<br>PM2_supporting,<br>PM1, PP3,<br>PS4_moderate                              | 19150014,<br>22765922              |
| 69 | 39 | MYH7  | c.428G>A  | p.R143Q      | rs397516209 | 68 | White | Male   | found dead at home | LP | PS4, PM2, PP1                                                                     |                                    |
| 35 | 48 | MYH7  | c.3133C>T | p.R1045<br>C | rs45611033  | 36 | White | Male   | found dead at home | LP | PP3,<br>PM2_supporting,<br>PS4                                                    |                                    |
| 14 | 13 | TNNT2 | c.322G>A  | p.E108K      | rs869312881 | 47 | White | Male   | witnessed collapse | P  | PP1, PP3, PM1,<br>PM2, PS3,<br>PS4_moderate                                       | 20083571                           |

|    |    |       |            |         |             |    |       |        |                    |    |                                                         |                                        |
|----|----|-------|------------|---------|-------------|----|-------|--------|--------------------|----|---------------------------------------------------------|----------------------------------------|
| 48 | 15 | TNNT2 | c.888G>A   | p.W296* | rs730881116 | 25 | White | Male   | found dead at home | LP | PM1, PM2_supporting, PS4, PVS1_Moderate                 | 9060892, 12707239, 228587948           |
| 58 | 16 | TNNT2 | c.848+1G>A |         | rs111377893 | 30 | White | Male   | found dead outside | P  | PM1, PM2_supporting, PS3, PS4_Supporting, PVS1_Moderate | 9060892, 21245263                      |
| 36 | 17 | TNNT2 | c.457C>T   | p.R151W | rs74315379  | 46 | White | Female | found dead in bed  | P  | PP1_strong, PP3, PM1, PM6, PS3, PS4                     | 14654368, 15623536, 12923187           |
| 18 | 18 | TNNT2 | c.364T>A   | p.F122I | rs121964858 | 48 | White | Female | found dead at home | P  | PP1_strong, PP3, PM2_supporting, PM1, PS3, PS4          | 10965086, 10617660, 12409295           |
| 60 | 19 | TNNT2 | c.317G>A   | p.R106H | rs397516457 | 52 | White | Female | found dead outside | LP | PP1, PP3, PM2_supporting, PM5, PS4                      | 20800588, 20031602, 20624503, 26507537 |
| 69 | 20 | TNNT2 | c.311G>T   | p.R104L | rs121964856 | 68 | White | Male   | found dead at home | LP | PP3, PM2_supporting, PM5, PS4_Moderate                  | 11560853                               |
| 55 | 21 | TNNT2 | c.280G>A   | p.G94R  | rs727504255 | 25 | White | Female | found dead at home | LP | PP1, PP3, PM1, PM2_supporting, PS4_Moderate             | 18809796, 19996403                     |



|    |    |       |           |              |                  |    |       |        |                              |    |                                                                         |                                                |
|----|----|-------|-----------|--------------|------------------|----|-------|--------|------------------------------|----|-------------------------------------------------------------------------|------------------------------------------------|
| 9  | 51 | SCN5A | c.4868G>A | p.R1623<br>Q | rs137854600      | 78 | Black | Female | MVA without any<br>clear CoD | LP | PP3,<br>PM2_supporting,<br>PM5_supporting,<br>PS4                       | 15840476,<br>19716085,<br>9506831              |
| 20 | 54 | SCN5A | c.481G>A  | p.E161K      | rs199473062      | 46 | White | Male   | found dead<br>outside        | P  | PP1_moderate,<br>PP3,<br>PM2_supporting,<br>PM5_supporting,<br>PM6, PS3 | 15910881,<br>20448214                          |
| 26 | 55 | SCN5A | c.4883G>A | p.R1628<br>Q | rs199473623      | 44 | Black | Male   | found dead<br>outside        | LP | PP3, PM1,<br>PM2_supporting,<br>PS3                                     | 22581653,<br>20129283,<br>24167619             |
| 41 | 62 | SCN5A | c.2204C>T | p.A735V      | rs137854611      | 48 | White | Male   | found dead at<br>home        | LP | PP3, PM1,<br>PM2_supporting,<br>PM5_supporting,<br>PS3                  | 22795782,<br>20129283,<br>11823453             |
| 52 | 65 | SCN5A | c.1603C>T | p.R535*      | rs141703645<br>3 | 24 | White | Male   | found dead at<br>home        | P  | PM2_supporting,<br>PS3, PS4, PVS1                                       | 25757662,<br>20129283,<br>15890323             |
| 72 | 69 | SCN5A | c.4859C>T | p.T1620<br>M | rs199473282      | 58 | Black | Male   | MVA without any<br>clear CoD | LP | PP2, PP3, PM1,<br>PM2_supporting,<br>PS4_Supporting                     |                                                |
| 5  | 47 | KCNH2 | c.1886A>G | p.N629S      | rs199472957      | 57 | White | Male   | found dead<br>outside        | P  | PP2, PP3,<br>PM2_supporting,<br>PM5, PS3, PS4                           | 22581653,<br>19841300,<br>19716085,<br>9544837 |

|    |    |       |           |         |             |    |       |        |                    |    |                                                               |                                       |
|----|----|-------|-----------|---------|-------------|----|-------|--------|--------------------|----|---------------------------------------------------------------|---------------------------------------|
| 7  | 49 | KCNH2 | c.2464G>A | p.V822M | rs121912506 | 45 | Black | Female | found dead at home | P  | PS3, PS4_supporting, PM2_supporting, PM1, PP2, PP3            | 23303164, 10086971, 8914737           |
| 13 | 52 | KCNH2 | c.2467C>T | p.R823W | rs199473538 | 58 | Black | Male   | found dead at home | P  | PP2, PP3, PM2_supporting, PS3, PS4                            | 23631430, 21440677, 19716085          |
| 30 | 58 | KCNH2 | c.1847A>G | p.Y616C | rs199472946 | 46 | White | Male   | found dead at home | LP | PP2, PP3, PM1, PM2_supporting, PS4_Moderate                   | 22581653, 19716085                    |
| 53 | 66 | KCNH2 | c.1898A>G | p.N633S | rs199472961 | 26 | White | Male   | witnessed collapse | P  | PP1_strong, PP2, PP3, PM2_supporting, PS3, PS4                | 16842670, 9544837, 22949429, 17088455 |
| 19 | 53 | KCNQ1 | c.686G>A  | p.G229D | rs199472708 | 34 | White | Male   | witnessed collapse | LP | PP3, PM2_supporting, PS3, PS4_moderate                        | 24096004, 30967788                    |
| 27 | 56 | KCNQ1 | c.395G>A  | p.R132H | rs199472720 | 41 | White | Male   | found dead at home | LP | PP3, PM2_supporting, PM5, PS3                                 |                                       |
| 44 | 64 | KCNQ1 | c.914G>C  | p.W305S | rs120074186 | 37 | Black | Female | witnessed collapse | P  | PP3, PM2_supporting, PM3_supporting, PM5_supporting, PS3, PS4 | 9312006                               |

|    |    |       |           |          |             |    |       |        |                    |    |                                                   |                                        |
|----|----|-------|-----------|----------|-------------|----|-------|--------|--------------------|----|---------------------------------------------------|----------------------------------------|
| 54 | 67 | KCNQ1 | c.773A>G  | p.H258R  | rs199472718 | 24 | Black | Female | witnessed collapse | LP | PP3, PM1, PM2_supporting, PS3                     | 19913547                               |
| 63 | 68 | KCNQ1 | c.425G>A  | p.G142D  | rs120074194 | 35 | Black | Male   | found dead at home | P  | PP1_moderate, PP3, PM2_supporting, PM5, PS3       |                                        |
| 11 | 3  | RYR2  | c.7159G>A | p.A2387T | rs794728753 | 36 | Black | Male   | found dead at home | LP | PP2, PP3, PM2_supporting, PM5, PS4                | 16188589, 19398665                     |
| 24 | 3  | RYR2  | c.7159G>A | p.A2387T | rs794728753 | 40 | Black | Male   | found dead at home | LP | PP2, PP3, PM2_supporting, PM5, PS4                | 16188589, 19398665                     |
| 37 | 61 | RYR2  | c.1259G>A | p.R420Q  | rs794728721 | 38 | Black | Male   | found dead         | LP | PP3, PM1, PM2_supporting, PS3                     | 27452199, 28422759, 26153920           |
| 15 | 41 | TNNI3 | c.607G>A  | p.G203S  | rs267607127 | 39 | White | Female | found dead outside | LP | PM2_supporting, PM1, PP3, PS4_supporting          | 9241277                                |
| 54 | 42 | TNNI3 | c.544G>A  | p.E182K  | rs397516355 | 24 | Black | Female | witnessed collapse | LP | PM2_supporting, PM1, PS4_moderate, PM6_supporting | 22464770, 24503780                     |
| 63 | 43 | TNNI3 | c.470C>T  | p.A157V  | rs397516353 | 35 | Black | Male   | found dead at home | P  | PM2_supporting, PM1, PP1_strong, PP3, PS4         | 12707239, 15607392, 16335287, 19645627 |

|    |    |       |           |              |             |    |       |        |                    |    |                                                               |                                    |
|----|----|-------|-----------|--------------|-------------|----|-------|--------|--------------------|----|---------------------------------------------------------------|------------------------------------|
| 16 | 2  | TPM1  | c.605G>A  | p.R202H      | rs199476311 | 42 | White | Male   | found dead         | LP | PP2, PP3,<br>PM2_supporting,<br>PS2,<br>PS4_Supporting        | 20530761                           |
| 23 | 2  | TPM1  | c.605G>A  | p.R202H      | rs199476311 | 28 | Black | Male   | found dead at home | LP | PP2, PP3,<br>PM2_supporting,<br>PS2,<br>PS4_Supporting        | 20530761                           |
| 62 | 2  | TPM1  | c.605G>A  | p.R202H      | rs199476311 | 25 | Black | Female | witnessed collapse | LP | PP2, PP3,<br>PM2_supporting,<br>PS2,<br>PS4_Supporting        | 20530761                           |
| 2  | 45 | ABCC9 | c.3460C>T | p.R1154<br>W | rs387907208 | 34 | White | Male   | undetermined       | LP | PP2, PP3,<br>PM2_supporting,<br>PM5_supporting,<br>PS4_strong | 22608503,<br>23307537,<br>22610116 |
| 3  | 46 | ABCC9 | c.4537G>A | p.A1513T     | rs121909304 | 44 | White | Female | found dead in bed  | LP | PP2, PP3,<br>PM2_supporting,<br>PS3,<br>PS4_supporting        | 15034580                           |
| 29 | 57 | DSP   | c.3337C>T | p.R1113<br>X | rs746877365 | 19 | White | Female | found dead in bed  | P  | PP1_strong,<br>PM2_supporting,<br>PS4, PVS1                   | 19095136,<br>19279339              |
| 32 | 60 | DSP   | c.699G>A  | p.W233X      | rs397516955 | 27 | White | Female | witnessed collapse | P  | PM2_supporting,<br>PS4_supporting,<br>PVS1                    | 16917092                           |

|    |    |              |           |               |                  |    |       |        |                              |    |                                                               |                       |
|----|----|--------------|-----------|---------------|------------------|----|-------|--------|------------------------------|----|---------------------------------------------------------------|-----------------------|
| 74 | 40 | <i>FLNC</i>  | c.697C>T  | p.Q233*       | rs155439746<br>4 | 44 | Black | Male   | MVA without any<br>clear CoD | P  | PM2_supporting,<br>PVS1,<br>PS4_supporting                    | 27908349              |
| 49 | 70 | <i>FLNC</i>  | c.6976C>T | p.R2326*      | rs748416758      | 28 | White | Male   | witnessed<br>collapse        | P  | PM2_supporting,<br>PVS1,<br>PS4_supporting,<br>PP1_supporting | 27908349              |
| 1  | 5  | <i>TNNC1</i> | c.251G>A  | p.C84Y        | rs267607126      | 50 | Black | Female | found dead in<br>bed         | LP | PP3,<br>PM2_supporting,<br>PS3, PS4_moderate                  | 18572189              |
| 15 | 5  | <i>TNNC1</i> | c.251G>A  | p.C84Y        | rs267607126      | 39 | White | Female | found dead<br>outside        | LP | PP3,<br>PM2_supporting,<br>PS3, PS4_moderate                  | 18572189              |
| 73 | 44 | <i>BAG3</i>  | c.262C>T  | p.Q88*        | rs155487700<br>1 | 20 | Black | Female | found dead in<br>bed         | LP | PM1,<br>PM2_supporting,<br>PVS1_Strong                        | 21353195              |
| 8  | 50 | <i>HCN4</i>  | c.1444G>A | p.G482R       | rs794727637      | 55 | Black | Female | found dead in<br>bed         | LP | PS1_moderate,<br>PM2_supporting,<br>PM1, PP2, PP3             | 25145518,<br>25145517 |
| 76 | 72 | <i>LMNA</i>  | c.768G>A  | p.Val256<br>= | rs794728593      | 44 | White | Male   | witnessed<br>collapse        | LP | PP1_strong,<br>PM2_supporting,<br>PS4_supporting,<br>PM4      | 28679633              |
| 31 | 59 | <i>PKP2</i>  | c.1138G>T | p.E380X       | rs878898365      | 25 | Black | Male   | witnessed<br>collapse        | P  | PM2_supporting,<br>PS4_moderate,<br>PVS1                      |                       |

|    |    |               |           |         |                  |    |       |      |                    |    |                                             |          |
|----|----|---------------|-----------|---------|------------------|----|-------|------|--------------------|----|---------------------------------------------|----------|
| 23 | 22 | <i>PRKAG2</i> | c.1463A>T | p.N488I | rs121908989      | 28 | Black | Male | found dead at home | LP | PP1, PP3, PM1, PM2_supporting, PS3          | 11827995 |
| 43 | 63 | <i>TGFB3</i>  | c.989G>A  | p.W330X | rs155536022<br>2 | 42 | Black | Male | found dead         | LP | PM2_supporting, PS4_supporting, PVS1_strong |          |

MVA- motor vehicle accident; CoD- cause of death; P-Pathogenic; LP-Likely Pathogenic; \*- termination or stop

**eTable 4. Patient Characteristics and Percentage Area Myocardial Fibrosis in Unexplained Sudden Cardiac Death cases with P/LP in HCM Genes and Detailed Septal Evaluations**

| Patient characteristics                                                   | P/LP in HCM gene (+)<br>N=21 | P/LP in HCM gene (-)<br>N=22 | P value |
|---------------------------------------------------------------------------|------------------------------|------------------------------|---------|
| Age                                                                       | 39 (25-47)                   | 31 (22-44)                   | 0.2     |
| Race (African American), n (%)                                            | 8 (38%)                      | 13 (59%)                     | 0.2     |
| Sex (Female), n (%)                                                       | 14 (67%)                     | 9 (41%)                      | 0.1     |
| Body height, cm                                                           | 175 (165-179)                | 178 (168-184)                | 0.3     |
| Body Weight, kg                                                           | 91 (70-114)                  | 86 (81-104)                  | 0.8     |
| Body Mass Index, kg/m <sup>2</sup>                                        | 29.7 (23.5-36.7)             | 27.9 (25.9-34.0)             | 0.9     |
| Body Surface Area, m <sup>2</sup>                                         | 1.99 (1.70-2.20)             | 1.91 (1.82-2.07)             | 0.9     |
| Heart Weight, g                                                           | 380 (308-456)                | 429 (358-461)                | 0.4     |
| LV diameter, mm                                                           | 35 (28-40)                   | 33 (30-36)                   | 0.7     |
| LV free wall thickness, mm                                                | 13 (11-15)                   | 13 (11-15)                   | 0.9     |
| Septum thickness, mm                                                      | 14 (12-15)                   | 15 (13-16)                   | 0.4     |
| RV thickness, mm                                                          | 4 (4-5)                      | 5 (4-5)                      | 0.4     |
| Septum / Free wall ratio                                                  | 1.1 (1.0-1.1)                | 1.1 (1.1-1.2)                | 0.6     |
| <b>Results</b>                                                            |                              |                              |         |
| Percent area fibrosis in myocardium, (%)<br>(mean value from 4 locations) | 1.02 (0.76-1.55)             | 0.93 (0.70-1.40)             | 0.5     |

HCM= hypertrophic cardiomyopathy, P/LP=pathogenic / likely pathogenic, SCD=sudden cardiac death, LV=left ventricle

**eTable 5. Patient Characteristics in African American and White Individuals With and Without P/LP Gene Variants**

| Patient Characteristics                  | P/LP variant (+) n=76 |                     | P/LP variant (-) n=337 |                     | p value |         |
|------------------------------------------|-----------------------|---------------------|------------------------|---------------------|---------|---------|
|                                          | African American n=32 | Whites n=44         | African American n=176 | Whites n=161        | P (AA)  | P (C)   |
| <b>Age</b>                               | 39.0 (28.0-48.0)      |                     | 41.2 (31.0-48.0)       |                     | 0.22    |         |
| <b>Sex (Female), n (%)</b>               | 29 (38.2%)            |                     | 125 (37.1%)            |                     | 0.52    |         |
| <b>Race (African American), n (%)</b>    | 32 (42.1%)            |                     | 176 (52.2%)            |                     | 0.47    |         |
| <b>Body / Heart Dimensions</b>           | African American n=32 | Whites n=44         | African American n=176 | Whites n=161        | P (AA)  | P (C)   |
| <b>Body height, cm</b>                   | 170.2 (165.1-177.8)   | 174.0 (169.5-180.3) | 172.7 (165.1-180.3)    | 175.3 (167.2-180.3) | 0.04*   | 0.94    |
| <b>Body Weight, kg</b>                   | 76.0 (63.5-108.4)     | 81.0 (72.6-93.9)    | 82.6 (69.0-95.3)       | 82.8 (70.8-96.7)    | 0.54    | 0.73    |
| <b>Body Mass Index, kg/m<sup>2</sup></b> | 26.3 (22.0-33.5)      | 26.7 (23.0-29.5)    | 27.3.0 (22.4-31.0)     | 27.1 (22.6-30.9)    | 0.78    | 0.57    |
| <b>Body Surface Area, m<sup>2</sup></b>  | 1.78 (1.58-2.00)      | 1.86 (1.70-1.99)    | 1.83 (1.69-2.03)       | 1.87 (1.70-2.05)    | 0.32    | 0.77    |
| <b>Heart Weight, g</b>                   | 390.0 (320.0-450.0)   | 395.0 (348.0-452.5) | 410.0 (340.0-450.0)    | 410.0 (350.0-451.3) | 0.18    | 0.20    |
| <b>LV diameter, mm</b>                   | 35.0 (30.0-40.0)      | 30.0 (20.0-40.0)    | 35.0 (30.0-40.0)       | 35.0 (30.0-40.0)    | 0.25    | <0.01** |
| <b>LV free wall thickness, mm</b>        | 13.0 (12.0-15.0)      | 14.0 (12.0-15.0)    | 14.0 (12.0-15.0)       | 13.0 (12.0-15.0)    | 0.70    | 0.06    |
| <b>Septum thickness, mm</b>              | 14.0 (12.0-16.0)      | 14.0 (10.8-15.0)    | 15.0 (13.0-16.0)       | 15.0 (13.0-16.0)    | <0.01** | <0.01** |
| <b>RV thickness, mm</b>                  | 4.0 (4.0-5.0)         | 4.0 (4.0-5.0)       | 4.0 (4.0-5.0)          | 5.0 (4.0-5.0)       | 0.53    | 0.60    |
| <b>Septum / Free wall ratio</b>          | 1.08 (1.02-1.18)      | 1.08 (1.03-1.17)    | 1.08 (1.00-1.17)       | 1.08 (1.00-1.15)    | 0.88    | 0.11    |

AA=African American; W= Whites; P/LP=pathogenic / likely pathogenic, HCM= hypertrophic cardiomyopathy, SCD=sudden cardiac death, MAF= minor allele frequency, LV=left ventricle, RV=right ventricle, BW=body weight. Data are shown at median (IQR) unless indicated. T test results were shown as p-value, \* p<0.05, \*\*p<0.01, \*\*\*p<0.001



**eTable 6. Variants With Unknown Significance in African American Individuals Only, With Suspicion for a Pathogenic Role in Unexplained SCD**

| Chr | Position | Gene | Identifier  | Ref | Alt | MAF in CVPPath Cohort | Carrier | Ontology         | HGVS p.      | Global MAF | Enrichment Fold |
|-----|----------|------|-------------|-----|-----|-----------------------|---------|------------------|--------------|------------|-----------------|
| 14  | 23886493 | MYH7 | rs890401818 | G   | A   | 0.0083                | 4       | missense variant | p.Ser1463Leu | 0          | -               |
| 17  | 41758792 | JUP  | rs782309611 | G   | A   | 0.0060                | 3       | missense variant | p.Arg526Cys  | 0.0000187  | 320             |

SCD=sudden cardiac death, MAF= minor allele frequency

**eTable 7. Allele Frequencies of P/LP Variants in Unexplained SCD Cohort and in gnomAD**

| Gene   | Number of P/LP variants | Variants                                                                                                                                                                                                                                                                                      | Study unexplained SCD Cohort |                           | gnomAD Data                         |                                       |
|--------|-------------------------|-----------------------------------------------------------------------------------------------------------------------------------------------------------------------------------------------------------------------------------------------------------------------------------------------|------------------------------|---------------------------|-------------------------------------|---------------------------------------|
|        |                         |                                                                                                                                                                                                                                                                                               | Whites (n=205)               | African Americans (n=208) | Europeans (non-Finnish) (n=129,166) | Africans/African Americans (n=24,966) |
| MYBPC3 | 18                      | c.505+1G>A, c.1927+2T>C, c.2905C>T p.Q969*, c.3811C>T p.R1271*, c.3627+1G>A, c.3331-1G>A, c.3293G>A p.W1098*, c.3253G>T p.E1085*, c.3190+1G>A, c.2992C>T p.Q998*, c.1458G>A p.W486*, c.1351+1G>A, c.1273C>T p.Q425*, c.1223+1G>A, c.1090+1G>A, c.927-2A>G, c.292G>T p.E98*, c.2458C>T p.R820W | 0.0536(11)                   | 0.0432(9)                 | 0.00008(10)                         | 0.00016(4)                            |
| MYH7   | 10                      | c.2710C>T p.R904C, c.1207C>T p.R403W, c.596C>T p.A199V, c.5740G>A p.E1914K, c.4135G>A p.A1379T, c.1816G>A p.V606M, c.2334C>G p.D778E, c.741C>A p.F247L, c.428G>A p.R143Q, c.3133C>T p.R1045C                                                                                                  | 0.0634(13)                   | 0.0288 (6)                | 0.00006(8)                          | 0.00040(10)                           |
| TNNT2  | 7                       | c.322G>A p.E108K, c.888G>A p.W296*, c.848+1G>A, c.457C>T p.R151W, c.364T>A p.F122I, c.317G>A p.R106H, c.311G>T p.R104L, c.280G>A p.G94R                                                                                                                                                       | 0.0390(8)                    | 0.0(0)                    | 0.000008(1)                         | 0.0(0)                                |
| SCN5A  | 6                       | c.4868G>A p.R1623Q, c.481G>A p.E161K, c.4883G>A p.R1628Q, c.2204C>T p.A735V, c.1603C>T p.R535*, c.4859C>T p.T1620M                                                                                                                                                                            | 0.0146(3)                    | 0.0144(3)                 | 0.000008(1)                         | 0.0(0)                                |

|        |   |                                                                                               |           |           |             |            |
|--------|---|-----------------------------------------------------------------------------------------------|-----------|-----------|-------------|------------|
| KCNH2  | 5 | c.1886A>G p.N629S, c.2464G>A p.V822M, c.2467C>T p.R823W, c.1847A>G p.Y616C, c.1898A>G p.N633S | 0.0146(3) | 0.0096(2) | 0.000016(2) | 0.00016(4) |
| KCNQ1  | 5 | c.686G>A p.G229D, c.395G>A p.R132H, c.914G>C p.W305S, c.773A>G p.H258R, c.425G>A p.G142D      | 0.0098(2) | 0.0144(3) | 0.0(0)      | 0.0(0)     |
| TNNI3  | 3 | c.607G>A p.G203S, c.544G>A p.E182K, c.470C>T p.A157V                                          | 0.0049(1) | 0.0096(2) | 0.0(0)      | 0.0(0)     |
| DSP    | 2 | c.3337C>T p.R1113X, c.699G>A p.W233X                                                          | 0.0098(2) | 0.0(0)    | 0.000008(1) | 0.0(0)     |
| RYR2   | 2 | c.7159G>A p.A2387T, c.1259G>A p.R420Q                                                         | 0.0(0)    | 0.0144(3) | 0.0(0)      | 0.0(0)     |
| FLNC   | 2 | c.697C>T p.Q233*, c.6976C>T p.R2326*                                                          | 0.0049(1) | 0.0048(1) | 0.0(0)      | 0.0(0)     |
| ABCC9  | 2 | c.3460C>T p.R1154W, c.4537G>A p.A1513T                                                        | 0.0098(2) | 0.0(0)    | 0.0(0)      | 0.0(0)     |
| TPM1   | 1 | c.605G>A p.R202H                                                                              | 0.0049(1) | 0.0096(2) | 0.0(0)      | 0.0(0)     |
| BAG3   | 1 | c.262C>T p.Q88*                                                                               | 0.0(0)    | 0.0048(1) | 0.0(0)      | 0.0(0)     |
| TNNC1  | 1 | c.251G>A p.C84Y                                                                               | 0.0049(1) | 0.0048(1) | 0.0(0)      | 0.0(0)     |
| LMNA   | 1 | c.768G>A p.Val256=                                                                            | 0.0049(1) | 0.0(0)    | 0.0(0)      | 0.0(0)     |
| HCN4   | 1 | c.1444G>A p.G482R                                                                             | 0.0(0)    | 0.0048(1) | 0.0(0)      | 0.0(0)     |
| TGFB3  | 1 | c.989G>A p.W330X                                                                              | 0.0(0)    | 0.0048(1) | 0.0(0)      | 0.0(0)     |
| PKP2   | 1 | c.1138G>T p.E380X                                                                             | 0.0(0)    | 0.0048(1) | 0.0(0)      | 0.0(0)     |
| PRKAG2 | 1 | c.1463A>T p.N488I                                                                             | 0.0(0)    | 0.0048(1) | 0.0(0)      | 0.0(0)     |

## eReferences

1. Scholz DG, Kitzman DW, Hagen PT, Ilstrup DM, Edwards WD. Age-related changes in normal human hearts during the first 10 decades of life. Part I (Growth): A quantitative anatomic study of 200 specimens from subjects from birth to 19 years old. *Mayo Clin Proc.* Feb 1988;63(2):126-136.
2. Maron BJ, Henry WL, Roberts WC, Epstein SE. Comparison of echocardiographic and necropsy measurements of ventricular wall thicknesses in patients with and without disproportionate septal thickening. *Circulation.* Feb 1977;55(2):341-346.
3. Kocovski L, Fernandes J. Sudden cardiac death: a modern pathology approach to hypertrophic cardiomyopathy. *Archives of pathology & laboratory medicine.* Mar 2015;139(3):413-416.
4. Hughes SE. The pathology of hypertrophic cardiomyopathy. *Histopathology.* May 2004;44(5):412-427.
5. Maron BJ, Wolfson JK, Epstein SE, Roberts WC. Intramural ("small vessel") coronary artery disease in hypertrophic cardiomyopathy. *Journal of the American College of Cardiology.* Sep 1986;8(3):545-557.
6. Maron BJ, Maron MS. Hypertrophic cardiomyopathy. *Lancet (London, England).* Jan 19 2013;381(9862):242-255.
7. Maron BJ, Roberts WC. Quantitative analysis of cardiac muscle cell disorganization in the ventricular septum of patients with hypertrophic cardiomyopathy. *Circulation.* Apr 1979;59(4):689-706.
8. Sakamoto AY, K.; Romero, M.E.; Virmani, R. Pathology and Pathophysiology. *Hypertrophic Cardiomyopathy, Springer* 2019:23-40.
9. Tracy RE, Sander GE. Histologically measured cardiomyocyte hypertrophy correlates with body height as strongly as with body mass index. *Cardiology research and practice.* 2011;2011:658958.
10. Kelly MA, Caleshu C, Morales A, et al. Adaptation and validation of the ACMG/AMP variant classification framework for MYH7-associated inherited cardiomyopathies: recommendations by ClinGen's Inherited Cardiomyopathy Expert Panel. *Genetics in medicine : official journal of the American College of Medical Genetics.* Mar 2018;20(3):351-359.
11. Jarvik GP, Browning BL. Consideration of Cosegregation in the Pathogenicity Classification of Genomic Variants. *American journal of human genetics.* Jun 2 2016;98(6):1077-1081.
12. Abou Tayoun AN, Pesaran T, DiStefano MT, et al. Recommendations for interpreting the loss of function PVS1 ACMG/AMP variant criterion. *Human mutation.* Nov 2018;39(11):1517-1524.
